# Supplementary material
Source: Elsevier journal article supplement (https://www.sciencedirect.com/science/article/pii/S0211139X18305481)
Supplement: mmc1 [file S0211139X18305481:mmc1.docx]

ANEXO 1. Test Alusti, versiones completa y abreviada. Instrucciones de utilización

| **VARIABLE** | | **DESCRIPCION** | | **PUNTOS** | |
| --- | --- | --- | --- | --- | --- |
| DECUBITO SUPINO | ***Extremidades articular pasivo** | Se valoran las 4 extremidades.  La puntuación para cada extremidad será 0-1-2.  Informa de forma generalizada del estado articular pasivo de la extremidad. | EESS | 0 | NO FUNCIONAL. Flexión pasiva de hombro entre 0-45º |
| 1 | FUNCIONAL. Flexión pasiva de hombro entre 45º-90º |
| 2 | BUENO. Flexión pasiva de hombro superior a 90º |
| EEII | 0 | NO FUNCIONAL. Importante flexum de cadera y/o rodilla que imposibilita la marcha |
| 1 | FUNCIONAL. Limitación de movimiento articular pasivo de alguna articulación que dificulte la marcha sin imposibilitarla |
| 2 | BUENO. Movilidad articular pasiva de extremidades adecuado, sin que dificulte la marcha |
| Extremidades articular activa | Se valora el balance muscular de las cuatro extremidades.  La puntuación para cada extremidad será 0-1-2-3-4-5.  Para las EE.SS, se valora la flexión activa de hombros.  Para las EE.II, se valora la elevación de las piernas con extensión de rodillas contra la gravedad. | EESS  EEII | 0 | No hay contracción muscular |
| 1 | No hay contracción muscular |
| 2 | Movimiento activo, sin gravedad |
| 3 | Movimiento activo, contra la gravedad |
| 4 | Movimiento activo contra la gravedad y resistencia |
| 5 | Potencia muscular normal |
| Trasferencia decúbito supino –sedestación | La persona partirá de la posición de decúbito supino, y terminará sentado al borde de la cama. | | 0 | Imposible. Gran ayuda de 2 personas |
| 1 | Moderada. Máxima ayuda de 1 persona |
| 2 | Mínima ayuda de 1 persona |
| 3 | Autónomo, con más de 1 intento, precisando supervisión |
| 4 | Autónomo, un intento con dificultad |
| 5 | Autónomo, sin dificultad |

| **VARIABLE** | | **DESCRIPCION** | **PUNTOS** | |
| --- | --- | --- | --- | --- |
| SEDESTACION | ***Tronco en sedestación** | Se sentará a la persona en una camilla, sin apoyo posterior, con los pies apoyados en el suelo. Se valorara la capacidad para mantener el control del tronco sin ningún apoyo. Las manos colocadas sobre los muslos. | 0 | Imposible/Gran ayuda de 2 personas |
| 1 | Moderada-máxima ayuda de dos personas |
| 2 | Mínima ayuda de 1 persona |
| 3 | Autónomo con más de 1 intento, precisando supervisión. |
| 4 | Autónomo, estable sin supervisión. |
| 5 | Autónomo, estable antes pequeños empujones sobre el tronco. |
| Transferencia sedestación-bipedestación | La persona a valorar estará sentada en una silla con respaldo y reposabrazos. Se valorar la capacidad de ponerse en pie de forma autónoma. | 0 | Imposible/Gran ayuda de 2 personas. Manos sobre reposabrazos |
| 1 | Moderada-máxima ayuda de dos personas. Manos sobre reposabrazos. |
| 2 | Mínima ayuda de 1 persona. Manos sobre reposabrazos. |
| 3 | Autónomo con más de 1 intento, precisando supervisión. Manos sobre reposabrazos. |
| 4 | Autónomo, 1 intento. Manos sobre reposabrazos. |
| 5 | Autónomo. Manos en cruz sobre el pecho. |

| **VARIABLE** | | **DESCRIPCION** | **PUNTOS** | |
| --- | --- | --- | --- | --- |
| BIPEDESTACION | ***Bipedestación** | Persona en bipedestación, pies a la altura de las caderas.  Se valorará la capacidad para mantenerse de pie de forma autónoma. | 0 | 0.Imposible/ Gran ayuda de 2 personas |
| 1 | Moderado-máximo apoyo/descarga de 1 persona. |
| 2 | Mínimo apoyo/descarga de 1 persona |
| 3 | Autónomo, con más de un intento para mantener la estabilidad, precisando supervisión. |
| 4 | Autónomo, estable, un intento. |
| 5 | Autónomo, estable, ante pequeños empujones sobre el tronco |
| ***Marcha** | **La marcha asistida de andador + 1 persona, se puntuará con 5  * La marcha autónoma con andador se puntuará con 10. | 0 | Marcha nula o con ayuda física de 2 personas. |
| 5 | Marcha con gran ayuda física de 1 persona**. |
| 10 | Marcha con un ligero contacto físico de 1 persona*. |
| 15 | Marcha autónoma, con supervisión de 1 persona. |
| 20 | Marcha independiente en terreno llano. |
| 25 | Marcha independiente en terrenos irregulares. |
| ***Radio de acción de marcha** | Se valorará la distancia en metros que es capaz de caminar. | 0 | Marcha imposible. |
| 1 | Distancia caminada entre 0-10 metros. |
| 2 | Distancia caminada entre 10-20 metros. |
| 3 | Distancia caminada entre 20-50 metros. |
| 5 | Distancia caminada entre 50-150 metros. |
| 7 | Distancia caminada > 150 metros. |
| Tándem | **Ojos cerrados. Solo pasar si la puntuación en marcha es 25**  Persona en bipedestación, un pie delante del otro, tocando el talón de uno la punta del otro. Brazos al lado del cuerpo.  Se cronometrará el tiempo que se mantiene en esa postura.  Un primer intento de prueba con los ojos abiertos. El segundo intento será el válido, con los ojos cerrados.  Se pondrá el crono en marcha cuando cierre los ojos. Se parará el tiempo cuando abra los ojos o mueva un pie.  Se permitirá el libre movimiento de los brazos una vez que el crono se ponga en marcha. | 0 | Entre 0"-2” |
| 2 | Entre 2"-4” |
| 4 | Entre 4"-6" |
| 6 | Entre 6"-8" |
| 8 | Entre 8"-10" |
| 10 | Más de 10" |
| Apoyo unipodal | **Ojos cerrados. Solo pasar si la puntuación en marcha es 25**  Persona en bipedestación, deberá mantener la posición con el apoyo de un sólo pie. Brazos al lado del cuerpo.  Se cronometrará el tiempo que se mantiene en esa postura. Un primer intento de prueba con los ojos abiertos. El segundo intento será el válido, con los ojos cerrados.  Se pondrá el crono en marcha cuando cierre los ojos. Se parará el tiempo cuando abra los ojos o apoye los dos pies.  Se permitirá el libre movimiento de los brazos una vez que el crono se ponga en marcha. | 0 | Entre 0"-2” |
| 2 | Entre 2"-4” |
| 4 | Entre 4"-6" |
| 6 | Entre 6"-8" |
| 8 | Entre 8"-10" |
| 10 | Más de 10" |

*Items correspondientes al Test Alusti, versión abreviada

| **TEST ALUSTI** | | **TEST ALUSTI ABREVIADO*** | |
| --- | --- | --- | --- |
| **PUNTUACION** | **CLASIFICACION MOVILIDAD** | **PUNTUACION** | **CLASIFICACION** |
| 0-30 | Dependencia total | 0-15 | Dependencia total |
| 31-40 | Dependencia severa | 16-30 | Dependencia grave |
| 41-50 | Dependencia moderada | 31-36 | Dependencia leve |
| 51-60 | Dependencia leve | 37-50 | Movilidad conservada |
| 61-75 | Buena |  | |
| 76-90 | Muy buena |
