# Supplementary material
Source: Elsevier journal article supplement (https://www.sciencedirect.com/science/article/pii/S0211139X18305481)
Supplement: mmc2 [file S0211139X18305481:mmc2.docx]

**Tabla 7**

CCI del test Alusti abreviado en los diferentes grupos de población, incluyendo (N) a la población que ha realizado ambas pruebas (excluidos: se consideran aquellos usuarios que no han podido realizar la prueba comparativa).

A:Tinetti

| Tipo de Población | N | Excluidos | CCI | IC 95% |
| --- | --- | --- | --- | --- |
| Hospitalizada | 143 | 33 | 0,869 | 0,822-0,904 |
| Residencial | 62 | 77 | 0,825 | 0,726-0,891 |
| Comunitaria | 47 | 1 | 0,929 | 0,875-0,960 |

B: TUG

| Tipo de Población | N | Excluidos | CCI | IC 95% |
| --- | --- | --- | --- | --- |
| Hospitalizada | 78 | 98 | (-0,520) | (-0,665)-(-0,338) |
| Residencial | 56 | 83 | (-0,528) | (-0,694)-(-0,310) |
| Comunitaria | 44 | 4 | (-0,570) | (-0,740)-(-0,331) |

C:IB

| Tipo de Población | N | Excluidos | CCI | IC 95% |
| --- | --- | --- | --- | --- |
| Hospitalizada | 176 | 0 | 0,683 | 0,595-0,754 |
| Residencial | 139 | 0 | 0,735 | 0,648-0,803 |
| Comunitaria | 48 | 0 | 0,659 | 0,463-0,793 |

D: SPPB

| Tipo de Población | N | Excluidos | CCI | IC 95% |
| --- | --- | --- | --- | --- |
| Hospitalizada | 85 | 91 | 0,633 | 0,486-0,745 |
| Residencial | 56 | 83 | 0,424 | 0,194-0,617 |
| Comunitaria | 44 | 4 | 0,800 | 0,661-0,886 |

E: VM

| Tipo de Población | N | Excluidos | CCI | IC 95% |
| --- | --- | --- | --- | --- |
| Hospitalizada | 79 | 97 | (-0,682) | (-0,785)-(-0,544) |
| Residencial | 56 | 83 | (-0,520) | (-0,688)-(-0,300) |
| Comunitaria | 44 | 4 | (-0,803) | (-0,888)-(-0,666) |

CCI: Coeficiente de correlación intraclase; IB: Índice de Barthel; IC: Intervalo de confianza; SPPB: Short Physical Performance Battery; TUG: Timed “Up & Go” Test VM: Velocidad de la marcha.

**Tabla 8.**

CCI del test Alusti en los diferentes grupos de población, incluyendo (N) a la población que ha realizado ambas pruebas (excluidos: se consideran aquellos usuarios que no han podido realizar la prueba comparativa).

A:Tinetti

| Tipo de Población | N | Excluidos | CCI | IC 95% |
| --- | --- | --- | --- | --- |
| Hospitalizada | 138 | 38 | 0,808 | 0,741-0,859 |
| Residencial | 61 | 78 | 0,674 | 0,510-0,791 |
| Comunitaria | 45 | 3 | 0,661 | 0,459-0,799 |

B: TUG

| Tipo de Población | N | Excluidos | CCI | IC 95% |
| --- | --- | --- | --- | --- |
| Hospitalizada | 78 | 98 | (-0,633) | (-0,750)-(-0,479) |
| Residencial | 56 | 83 | (-0,545) | (-0,705)-(-0,331) |
| Comunitaria | 44 | 4 | (-0,682) | (-0,813)-(-0,485) |

C: IB

| Tipo de Población | N | Excluidos | CCI | IC 95% |
| --- | --- | --- | --- | --- |
| Hospitalizada | 148 | 28 | 0,810 | 0,746-0,859 |
| Residencial | 115 | 24 | 0,872 | 0,820-0,910 |
| Comunitaria | 45 | 3 | 0,873 | 0,781-0,928 |

D: SPPB

| Tipo de Población | N | Excluidos | CCI | IC 95% |
| --- | --- | --- | --- | --- |
| Hospitalizada | 85 | 91 | 0,482 | 0,310-0,630 |
| Residencial | 56 | 83 | 0,333 | 0,079-0,546 |
| Comunitaria | 44 | 4 | 0,494 | 0,235-0,688 |

E: VM

| Tipo de Población | N | Excluidos | CCI | IC 95% |
| --- | --- | --- | --- | --- |
| Hospitalizada | 78 | 98 | (-0,655) | (-0,765)-(-0,507) |
| Residencial | 56 | 83 | (-0,490) | (-0,666)-(-0,263) |
| Comunitaria | 44 | 4 | (-0,570) | (-0,740)-(-0,331) |

CCI: Coeficiente de correlación intraclase; IB: Índice de Barthel; IC: Intervalo de confianza; SPPB: Short Physical Performance Battery; TUG: Timed “Up & Go” Test VM: Velocidad de la marcha.
