# Supplementary material
Source: Elsevier journal article supplement (https://www.sciencedirect.com/science/article/pii/S0211139X18305481)
Supplement: mmc3 [file S0211139X18305481:mmc3.docx]

AUTORES

JUAN JOSE CALVO AGUIRRE

JOSU ALUSTIZA NAVARRO

TEST ALUSTI©

|  | | |  | | |  | | |  |  |  | |  | | | | | | | | | | | | |  | | | | |
| --- | --- | --- | --- | --- | --- | --- | --- | --- | --- | --- | --- | --- | --- | --- | --- | --- | --- | --- | --- | --- | --- | --- | --- | --- | --- | --- | --- | --- | --- | --- |
|  | | |  | | |  | | |  |  |  | |  | | | | | | | | | | | | |  | | | | |
|  | | |  | | | **TEST ALUSTI©** | | | | |  | |  | | | | | | | | | | | | |  | | | | |
|  | |
|  | | |  | | |  | | |  |  |  | |  | | | | | | | | | | | | |  | | | | |
|  | | |  | | |  | | |  |  |  | |  | | | | | | | | | | | | |  | | | | |
| **1.-EXTREMIDADES ARTICULAR PASIVO** | | | | | | | | |  | **2.-EXTREMIDADES MUSCULAR ACTIVO** | | | | | | | | | | | | | | | | | | | | |
|  | | |  | | |  | | |  |  |  | |  | | | | | | | | | | | | |  | | | | |
|  | | | INGRESO | | | ALTA | | |  |  | INGRESO | | ALTA | | | | | | | | | | | | |  | | | | |
| **ES.D** | | |  | | |  | | |  | **ES.D** |  | |  | | | | | | | | | | | | |  | | | | |
| **ES.I** | | |  | | |  | | |  | **ES.I** |  | |  | | | | | | | | | | | | |  | | | | |
| **EI.D** | | |  | | |  | | |  | **EI.D** |  | |  | | | | | | | | | | | | |  | | | | |
| **EI.I** | | |  | | |  | | |  | **EI.I** |  | |  | | | | | | | | | | | | |  | | | | |
|  | | | *baremo(0-2) | | |  | | |  |  | *baremo(0-5) | |  | | | | | | | | | | | | |  | | | | |
|  | | |  | | |  | | |  |  |  | |  | | | | | | | | | | | | |  | | | | |
| **3.-TRANSFERENCIA DEC SUPINO -SEDESTACION** | | | | | | | | |  | **4.-TRONCO EN SEDESTACIÓN** | | | | | | | | | | | | | | | |  | | | | |
|  | | |  | | |  | | |  |  |  | |  | | | | | | | | | | | | |  | | | | |
|  | | | INGRESO | | | ALTA | | |  |  | INGRESO | | ALTA | | | | | | | | | | | | |  | | | | |
|  | | |  | | |  | | |  |  |  | |  | | | | | | | | | | | | |  | | | | |
|  | | | *baremo(0-5) | | |  | | |  |  | *baremo(0-5) | |  | | | | | | | | | | | | |  | | | | |
|  | | |  | | |  | | |  |  |  | |  | | | | | | | | | | | | |  | | | | |
| **5.-TRANSFERENCIA SEDESTACIÓN-BIPEDESTACIÓN** | | | | | | | | | | **6.-BIPEDESTACIÓN** | | |  | | | | | | | | | | | | |  | | | | |
|  | | | INGRESO | | | ALTA | | |  |  | INGRESO | | ALTA | | | | | | | | | | | | |  | | | | |
|  | | |  | | |  | | |  |  |  | |  | | | | | | | | | | | | |  | | | | |
|  | | | *baremo(0-5) | | |  | | |  |  | *baremo(0-5) | |  | | | | | | | | | | | | |  | | | | |
|  | | |  | | |  | | |  |  |  | |  | | | | | | | | | | | | |  | | | | |
| **7.-MARCHA** | | |  | | |  | | |  | **8.-RADIO DE ACCIÓN DE MARCHA** | | | | | | | | | | | | | | | |  | | | | |
|  | | | INGRESO | | | ALTA | | |  |  | INGRESO | | ALTA | | | | | | | | | | | | |  | | | | |
|  | | |  | | |  | | |  |  |  | |  | | | | | | | | | | | | |  | | | | |
|  | | | *baremo(0-25) | | |  | | |  |  | *baremo(0-7) | |  | | | | | | | | | | | | |  | | | | |
|  | | |  | | |  | | |  |  |  | |  | | | | | | | | | | | | |  | | | | |
| **9.-TÁNDEM ojos cerrados(sólo si puntuación marcha es 25)** | | | | | | | | | | **10.-APOYO MONOPODAL ojos cerrados.** | | | | | | | | | | | | | | | | | | | | |
|  | | |  | | |  | | |  | **(sólo si puntuación de marcha es 25)** | | | | | | | | | | | | | | | |  | | | | |
|  | | | INGRESO | | | ALTA | | |  |  | INGRESO | | ALTA | | | | | | | | | | | | |  | | | | |
|  | | |  | | |  | | |  |  |  | |  | | | | | | | | | | | | |  | | | | |
|  | | | *baremo(0-10) | | |  | | |  |  | *baremo(0-10) | | |  | | | | | | | | | | | |
|  | | | **.-TEST DE ALUSTI** | | | | | |  |  |  | |  | | | | | | | | | | | | |  | | | | |
|  | | | INGRESO | | | ALTA | | |  |  |  | |  | | | | | | | | | | | | |  | | | | |
| Puntuación Total | | |  | | |  | | |  |  |  | |  | | | | | | | | | | | | |  | | | | |
|  | | | *baremo 0-100 | | |  | | |  |  |  | |  | | | | | | | | | | | | |  | | | | |
|  | | |  | | |  | | |  |  |  | |  | | | | | | | | | | | | |  | | | | |
|  | | | **Test de Alusti ( 0-100)** | | | | | |  |  |  | |  | | | | | | | | | | | | |  | | | | |
|  | | | 0-30: Movilidad totalmente dependiente. | | | | | | |  |  | |  | | | | | | | | | | | | |  | | | | |
|  | | | 31-40: Movilidad dependencia severa. | | | | | | |  |  | |  | | | | | | | | | | | | |  | | | | |
|  | | | 41-50: Movilidad dependencia moderada. | | | | | | |  |  | |  | | | | | | | | | | | | |  | | | | |
|  | | | 51-60: Movilidad dependencia leve. | | | | | | |  |  | |  | | | | | | | | | | | | |  | | | | |
|  | | | 61-75: Movilidad conservada. | | | | | | |  |  | |  | | | | | | | | | | | | |  | | | | |
|  | | | 76-90: Movilidad muy buena. | | | | | | |  |  | |  | | | | | | | | | | | | |  | | | | |
|  | | | 91-100: Movilidad excelente. | | | | | | |  |  | |  | | | | | | | | | | | | |  | | | | |
|  | | | | | | | | | | | | |  | | | | | | | | | | | | |  | | | | |
| Los ítems 9 y 10 sólo se pasarán si la puntuación ítem marcha es 25.  El Test de Alusti se pasará al paciente que pueda comprender la orden y ejecutarlo de forma voluntaria.  En el caso que no pueda comprender la orden, sólo se le administrará el Test de Alusti Abreviado | | | | | | | | | | | | |  | | | | | | | | | | | | |  | | | | |
| **TEST DE ALUSTI**.**ESPECIFICACIÓN DE LOS ÍTEMS:** | | | | | | | | | | | | | | | | | | | | | | | | | | | | | |  | | | | | | | | |
|  |  | | | | | | |  | | | | | | | | | | | | | | | | | | |  |  |  |  | | | | | | | | |
| **1.- EXTREMIDADES ARTICULAR PASIVO (0-2):** | | | | | | | | | | | | | | | | | | | | | | | | | | | |  |  |  | | | | | | | | |
| Se valorarán las 4 extremidades. | | | | | | | | | | | | | | | | | | | | | | | | | | |  |  |  |  | | | | | | | | |
| La puntuación para cada extremidad será 0-1-2. | | | | | | | | | | | | | | | | | | | | | | | | | | | |  |  |  | | | | | | | | |
| Nos informará de forma generalizada del estado articular pasivo de la extremidad. | | | | | | | | | | | | | | | | | | | | | | | | | | | | | |  | | | | | | | | |
|  | **Puntuaciones EE.SS:** | | | 0. NO FUNCIONAL. Flexión pasiva de hombro entre 0-45º | | | | | | | | | | | | | | | | | | | | | | | | | | | |
|  |  | | | 1.FUNCIONAL.Flexión pasiva de hombro entre 45º-90º | | | | | | | | | | | |  | | | | | | | | | | | | | | | |
|  |  | | | 2.BUENO.Flexión pasiva de hombro superior a 90º | | | | | | | | | | | |  | | | | | | | | | | | | | | | |
|  | **Puntuaciones EE.II:** | | | 0. NO FUNCIONAL. Importante flexum de cadera y/o rodilla que  imposibilita la marcha. | | | | | | | | | | | | | | | | | | | | | | | | | | | |
|  |  | | | 1.FUNCIONAL.Limitación de movimiento articular pasivo de alguna  articulación que dificulte la marcha sin imposibilitarla. | | | | | | | | | | | | | | | | | | | | | | | | | | | |
|  |  | | | 2.BUENO.Movilidad articular pasiva de extremidades adecuado,  sin que dificulte la marcha. | | | | | | | | | | | | | | | | | | | | | | | | | | | |
|  |  | | | | | | |  | | | | | | | | | | | | | | | | | | |  |  |  |  | | | | | | | | |
| **2.- EXTREMIDADES MUSCULAR ACTIVO(0-5):** | | | | | | | | | | | | | | | | | | | | | | | | | | | |  |  |  | | | | | | | | |
| Se valorará el balance muscular de cada una de las cuatro extremidades. | | | | | | | | | | | | | | | | | | | | | | | | | | | | | |  | | | | | | | | |
| Para las EE.SS se valorará la flexión activa de hombros. | | | | | | | | | | | | | | | | | | | | | | | | | | | | |  |  | | | | | | | | |
| para las EE.II se valorará la elevación de las piernas con extensión de rodillas contra la gravedad. | | | | | | | | | | | | | | | | | | | | | | | | | | | | | | | | | | | | | | |
|  | **Puntuación:** | | | 0.No hay contracción muscular. | | | | | | | | | | |  |  | | | | | | | | | | | | | | | |
|  |  | | | 1. No hay contracción muscular. | | | | | | | |  | | |  |  | | | | | | | | | | | | | | | |
|  |  | | | 2.Movimiento activo,sin gravedad. | | | | | | | | | | |  |  | | | | | | | | | | | | | | | |
|  |  | | | 3.Movimiento activo,contra la gravedad. | | | | | | | | | | |  |  | | | | | | | | | | | | | | | |
|  |  | | | 4.Movimiento activo contra la gravedad y resistencia | | | | | | | | | | | |  | | | | | | | | | | | | | | | |
|  |  | | | 5.Potencia muscular normal | | | | | | | | | | |  |  | | | | | | | | | | | | | | | |
|  |  | | | | | | |  | | | | | | | | | | | | | | | | | | |  |  |  |  | | | | | | | | |
| **3.-TRANSFERENCIA DEC.SUPINO-SEDESTACIÓN (0-5):** | | | | | | | | | | | | | | | | | | | | | | | | | | | | |  |  | | | | | | | | |
| La persona partirá de la posición de decúbito supino, y terminará sentado al borde de la cama. | | | | | | | | | | | | | | | | | | | | | | | | | | | | | | | | | | | | | | |
| Se valorará la capacidad que tiene para realizar la transferencia. | | | | | | | | | | | | | | | | | | | | | | | | | | | | |  |  | | | | | | | | |
|  | **Puntuación:** | | | 0.Imposible/ Gran ayuda de 2 personas. | | | | | | | | | | |  |  | | | | | | | | | | | | | | | |
|  |  | | | 1.Moderada-máxima ayuda de 1 persona. | | | | | | | | | | | |  | | | | | | | | | | | | | | | |
|  |  | | | 2.Mínima ayuda de 1 persona. | | | | | | | | | | |  |  | | | | | | | | | | | | | | | |
|  |  | | | 3.Autónomo,con más de 1 intento, precisando supervisión. | | | | | | | | | | | | | | | | | | | | | | | | | | | |
|  |  | | | 4.Autónomo,un intento,con dificultad. | | | | | | | | | | |  |  | | | | | | | | | | | | | | | |
|  |  | | | 5.Autónomo,sin dificultad. | | | | | | | |  | | |  |  | | | | | | | | | | | | | | | |
|  |  | | | | | | |  | | | | | | | | | | | | | | | | | | |  |  |  |  | | | | | | | | |
| **4.-TRONCO EN SEDESTACIÓN (0-5):** | | | | | | | | | | | | | | | | | | | | | | | | | | |  |  |  |  | | | | | | | | |
| Se sentará al paciente en la camilla,sin apoyo posterior,los pies apoyados en el suelo. | | | | | | | | | | | | | | | | | | | | | | | | | | | | | | | | | | | | | | |
| Se valorará la capacidad que tiene la persona para mantener el control del tronco sin apoyo alguno. | | | | | | | | | | | | | | | | | | | | | | | | | | | | | | | | | | | | | | |
| Las manos se colocarán sobre los muslos. | | | | | | | | | | | | | | | | | | | | | | | | | | | |  |  |  | | | | | | | | |
|  | **Puntuación:** | | | 0.Imposible/ Gran ayuda de 2 personas. | | | | | | | | | | |  |  | | | | | | | | | | | | | | | |
|  |  | | | 1.Moderada-máxima ayuda de 1 persona. | | | | | | | | | | | |  | | | | | | | | | | | | | | | |
|  |  | | | 2.Mínima ayuda de 1 persona. | | | | | | | | | | |  |  | | | | | | | | | | | | | | | |
|  |  | | | 3.Autónomo,con más de 1 intento, precisando supervisión. | | | | | | | | | | | | | | | | | | | | | | | | | | | |
|  |  | | | 4.Autónomo,estable, sin supervisión.. | | | | | | | | | | |  |  | | | | | | | | | | | | | | | |
|  |  | | | 5.Autónomo,estable,ante pequeños empujones sobre el tronco. | | | | | | | | | | | | | | | | | | | | | | | | | | | |
|  |  | | | | | | |  | | | | | | | | | | | | | | | | | | |  |  |  |  | | | | | | | | |
| **5.-TRANSFERENCIA SEDESTACIÓN-BIPEDESTACIÓN (0-5):** | | | | | | | | | | | | | | | | | | | | | | | | | | | | |  |  | | | | | | | | |
| La persona a valorar estará sentada en una silla con respaldo y apoyabrazos. | | | | | | | | | | | | | | | | | | | | | | | | | | | | | |  | | | | | | | | |
| Se valorará la capacidad de ponerse en pie de forma autónoma. | | | | | | | | | | | | | | | | | | | | | | | | | | | | |  |  | | | | | | | | |
|  | **Puntuación:** | | | 0.Imposible/ Gran ayuda de 2 personas,manos sobre los apoyabrazos. | | | | | | | | | | | | | | | | | | | | | | | | | | | |
|  |  | | | 1.Moderada-máxima ayuda de 1 persona ,manos sobre apoyabrazos . | | | | | | | | | | | | | | | | | | | | | | | | | | | |
|  |  | | | 2.Mínima ayuda de 1 persona,manos sobre los apoyabrazos. | | | | | | | | | | | | | | | | | | | | | | | | | | | |
|  |  | | | 3.Autónomo,con más de 1 intento, precisando supervisión,manos  sobre los apoyabrazos. | | | | | | | | | | | | | | | | | | | | | | | | | | | |
|  |  | | | 4.Autónomo,un intento,utilizando las manos sobre los apoyabrazos. | | | | | | | | | | | | | | | | | | | | | | | | | | | |
|  |  | | | 5.Autónomo,colocando los brazos en cruz sobre el pecho. | | | | | | | | | | | | | | | | | | | | | | | | | | | |
| **6.-BIPEDESTACIÓN (0-5):** | | | | | | | |  | | | | | | | | | | | | | | | | | | |  |  |  |  | | | | | | | | |
| Persona en bipedestación,pies a la altura de las caderas. | | | | | | | | | | | | | | | | | | | | | | | | | | | | |  |  | | | | | | | | |
| Se valorará la capacidad para mantenerse de pie de forma autónoma. | | | | | | | | | | | | | | | | | | | | | | | | | | | | | |  | | | | | | | | |
|  | **Puntuación:** | | | | 0.Imposible/ Gran ayuda de 2 personas. | | | | | | | | | | |  | | | |  | | | | | | | | | | | | | |
|  |  | | | | 1.Moderado-máximo apoyo/descarga de 1 persona. | | | | | | | | | | | | |  | | | | | | | | | | | | | | |
|  |  | | | | 2.Mínimo apoyo/descarga de 1 persona. | | | | | | | | | | |  | | | |  | | | | | | | | | | | | | |
|  |  | | | | 3,Autónomo,con más de un intento para mantener la estabilidad,  precisando supervisión. | | | | | | | | | | | | | | | | | | | | | | | | | | | |
|  |  | | | | 4.Autónomo,estable,un intento. | | | | | | | | | | |  | | | |  | | | | | | | | | | | | | |
|  |  | | | | 5.Autónomo,estable,ante pequeños empujones sobre el tronco. | | | | | | | | | | | | | | | | | | | | | | | | | | | |
| **7.-MARCHA (0-25):** | | | | | | | |  | | | | | | | | | | | | | | | | | | |  |  |  |  | | | | | | | | |
|  | **Puntuación:** | | | | 0.Marcha nula o con ayuda física de 2 personas. | | | | | | | | | | | | |  | | | | | | | | | | | | | | |
|  |  | | | | 5.Marcha con gran ayuda física de 1 persona**. | | | | | | | | | | | | |  | | | | | | | | | | | | | | |
|  |  | | | | 10.Marcha con un ligero contacto físico de 1 persona*. | | | | | | | | | | | | |  | | | | | | | | | | | | | | |
|  |  | | | | 15.Marcha sólo,con supervisión de 1 persona. | | | | | | | | | | | | |  | | | | | | | | | | | | | | |
|  |  | | | | 20.Marcha independiente en terreno llano. | | | | | | | | | | | | |  | | | | | | | | | | | | | | |
|  |  | | | | 25.Marcha independiente en terrenos irregulares.  **La marcha asistida de andador + 1 persona, se puntuará con 5  * La marcha autónoma con andador se puntuará con 10. | | | | | | | | | | | | |  | | | | | | | | | | | | | | |
| **8.-RADIO DE ACCIÓN DE MARCHA (0-7):** | | | | | | | | | | | | | | | | | | | | | | | | | | | |  |  |  | | | | | | | | |
| Se valorará la distancia en metros que es capaz de caminar. | | | | | | | | | | | | | | | | | | | | | | | | | | | | |  |  | | | | | | | | |
|  | **Puntuación:** | | | | | 0.Marcha imposible. | | | | | | | | | |  | | | |  | | |  | | | | | | | | | | | | |
|  |  | | | | | 1.Distancia caminada entre 0-10 metros. | | | | | | | | | | | | |  | | |  | | | | | | | | | | | | |
|  |  | | | | | 2.Entre 10-20 metros. | | | | | | | | | |  | | | |  | | |  | | | | | | | | | | | | |
|  |  | | | | | 3.Entre 20.50 metros. | | | | | | | | | |  | | | |  | | |  | | | | | | | | | | | | |
|  |  | | | | | 5.Entre 50-150 metros. | | | | | | | | | |  | | | |  | | |  | | | | | | | | | | | | |
|  |  | | | | | 7.Más de 150 metros. | | | | | | | | | |  | | | |  | | |  | | | | | | | | | | | | |
| **9.-TÁNDEM ojos cerrados (0-10)**  **(SÓLO PASAR A LOS QUE HAN OBTENIDO 25 PUNTOS ÍTEM MARCHA)** | | | | | | | | | | | | | | | | | | | | | | | | | | | | | | | | | | | | | | |
| Persona en bipedestación, un pie delante del otro,tocando el talón de uno la punta del otro.  Brazos al lado del cuerpo. | | | | | | | | | | | | | | | | | | | | | | | | | | | | | | | | | | | | | | |
| Se cronometrará el tiempo que se mantiene en esa postura. | | | | | | | | | | | | | | | | | | | | | | | | | | | | |  |  | | | | | | | | |
| Un primer intento de prueba con los ojos abiertos.El segundo intento será el válido,con los ojos cerrados. | | | | | | | | | | | | | | | | | | | | | | | | | | | | | | | | | | | | | | |
| Se pondrá el crono en marcha cuando cierre los ojos.Se parará el tiempo cuando abra los ojos o mueva un pie.  Se permitirá el libre movimiento de los brazos una vez que el crono se ponga en marcha. | | | | | | | | | | | | | | | | | | | | | | | | | | | | | | | | | | | | | | |
|  | **Puntuación:** 0. Entre 0"- 2" | | | | | | | | | | | | | | | | | | | | | | | | | | |  |  |  | | | | | | | | |
|  |  | | | | | | 2.Entre 2"-4" | | | | | | | | |  | | | |  | | |  | |  | | | | | | | | | | | | |
|  |  | | | | | | 4.Entre 4"-6" | | | | | | | | |  | | | |  | | |  | |  | | | | | | | | | | | | |
|  |  | | | | | | 6.Entre 6"-8" | | | | | | | | |  | | | |  | | |  | |  | | | | | | | | | | | | |
|  |  | | | | | | 8.Entre 8"-10" | | | | | | | | | |  | | | |  | | |  | | | | | | | | | | | | |
|  |  | | | | | | 10.Más de 10" | | | | | | | | | |  | | | |  | | |  | | | | | | | | | | | | |
| **10.-APOYO MONOPODAL ojos cerrados(0-10).**  **(SÓLO PASAR A LOS QUE HAN OBTENIDO 25 PUNTOS ÍTEM MARCHA)** | | | | | | | | | | | | | | | | | | | | | | | | | | | | | | | | | | | | | | |
| Persona en bipedestación, deberá mantener la posición con el apoyo de un sólo pie.  Brazos al lado del cuerpo. | | | | | | | | | | | | | | | | | | | | | | | | | | | | | | | | | | | | | | |
| Se cronometrará el tiempo que se mantiene en esa postura. | | | | | | | | | | | | | | | | | | | | | | | | | | | | |  |  | | | | | | | | |
| Un primer intento de prueba con los ojos abiertos. El segundo intento será el válido, con los ojos cerrados. | | | | | | | | | | | | | | | | | | | | | | | | | | | | | | | | | | | | | | |
| Se pondrá el crono en marcha cuando cierre los ojos. Se parará el tiempo cuando abra los ojos o apoye los dos  pies.  Se permitirá el libre movimiento de los brazos una vez que el crono se ponga en marcha. | | | | | | | | | | | | | | | | | | | | | | | | | | | | | | | | | | | | | | |
|  | **Puntuación:** 0. Entre 0"- 2" | | | | | | | | | | | | | | | | | | | | | | | | | | |  |  |  | | | | | | | | |
|  |  | | | | | | 2.Entre 2"-4" | | | | | | | | |  | | | |  | | |  | |  | | | | | | | | | | | | |
|  |  | | | | | | 4.Entre 4"-6" | | | | | | | | |  | | | |  | | |  | |  | | | | | | | | | | | | |
|  |  | | | | | | 6.Entre 6"-8" | | | | | | | | |  | | | |  | | |  | |  | | | | | | | | | | | | |
|  |  | | | | | | 8.Entre 8"-10" | | | | | | | | | |  | | | |  | | |  | | | | | | | | | | | | |
|  |  | | | | | | 10.Más de 10" | | | | | | | | | |  | | | |  | | |  | | | | | | | | | | | | |

Test de Alusti© Copyright 2017 Juan José Calvo, Josu Alustiza - Todos los Derechos Reservados
