# Supplementary material
Source: Elsevier journal article supplement (https://www.sciencedirect.com/science/article/pii/S0211139X18305481)
Supplement: mmc4 [file S0211139X18305481:mmc4.docx]

AUTORES

juan jose calvo aguirre

josu alustiza navarro

TEST ALUSTI ABREVIADO

|  |  | **TEST ALUSTI ABREVIADO** | | | | |  |
| --- | --- | --- | --- | --- | --- | --- | --- |
|  |  |  |  |  |  |  |  |
|  |  |  |  |  |  |  |  |
|  |  |  |  |  |  |  |  |
|  |  |  |  |  |  |  |  |
|  |  |  |  |  |  |  |  |
| **1.-EXTREMIDADES ARTICULAR PASIVO** | | |  | **2.-TRONCO EN SEDESTACIÓN** | | |  |
|  |  |  |  |  |  |  |  |
|  | INGRESO | ALTA |  |  | INGRESO | ALTA |  |
| **ES.D** |  |  |  |  |  |  |  |
| **ES.I** |  |  |  |  | *baremo(0-5) |  |  |
| **EI.D** |  |  |  |  |  |  |  |
| **EI.I** |  |  |  |  |  |  |  |
|  | *baremo(0-2) |  |  |  |  |  |  |
|  |  |  |  |  |  |  |  |
|  |  |  |  |  |  |  |  |
|  |  |  |  |  |  |  |  |
| **3.-BIPEDESTACIÓN** | |  |  | **4.-MARCHA** | |  |  |
|  |  |  |  |  |  |  |  |
|  | INGRESO | ALTA |  |  | INGRESO | ALTA |  |
|  |  |  |  |  |  |  |  |
|  | *baremo(0-5) |  |  |  | *baremo(0-25) |  |  |
|  |  |  |  |  |  |  |  |
|  |  |  |  |  |  |  |  |
|  |  |  |  |  |  |  |  |
| **5.-RADIO DE ACCIÓN DE MARCHA** | | |  |  |  |  |  |
|  |  |  |  |  |  |  |  |
|  | INGRESO | ALTA |  |  |  |  |  |
|  |  |  |  |  |  |  |  |
|  | *baremo(0-7) |  |  |  |  |  |  |
|  |  |  |  |  |  |  |  |
|  |  |  |  |  |  |  |  |
|  |  |  |  |  |  |  |  |
|  |  |  |  |  |  |  |  |
|  |  |  |  |  |  |  |  |
|  |  |  |  |  |  |  |  |
|  |  |  |  |  |  |  |  |
|  |  |  |  |  |  |  |  |
|  |  | **.-TEST DE ALUSTI Abreviado** | |  |  |  |  |
|  |  | *INGRESO* | *ALTA* |  |  |  |  |
| **Puntuación Total** |  |  |  |  |  |  |  |
|  |  | *baremo(0-50) |  |  |  |  |  |
|  |  | Test de Alusti Abreviado (0-50) | | |  |  |  |
|  |  |  |  |  |  |  |  |
|  |  | <16: Dependencia total. | | |  |  |  |
|  |  | 16-30: Dependencia grave. | | |  |  |  |
|  |  | 31-36: Dependencia leve.  >36: Movilidad conservada. | | |  |  |  |

| **TEST ALUSTI ABREVIADO**  **ESPECIFICACIÓN DE LOS ÍTEMS:** | | | | | | | |  |
| --- | --- | --- | --- | --- | --- | --- | --- | --- |
|  |  | |  | |  |  |  |  |
| **1.- EXTREMIDADES ARTICULAR PASIVO (0-2):** | | | | | |  |  |  |
| Se valorarán las 4 extremidades. | | | | |  |  |  |  |
| La puntuación para cada extremidad será 0-1-2. | | | | | |  |  |  |
| Nos informará de forma generalizada del estado articular pasivo de la extremidad. | | | | | | | |  |
|  | **Puntuaciones EE.SS:** | | 0. NO FUNCIONAL. Flexión pasiva de hombro entre 0-45º | | | | | |
|  |  | | 1.FUNCIONAL.Flexión pasiva de hombro entre 45º-90º | | | | |  |
|  |  | | 2.BUENO.Flexión pasiva de hombro superior a 90º | | | | |  |
|  | **Puntuaciones EE.II:** | | 0. NO FUNCIONAL. Importante flexum de cadera y/o rodilla que  Imposibilita la marcha. | | | | | |
|  |  | | 1.FUNCIONAL.Limitación de movimiento articular pasivo de alguna a  articulación que dificulte la marcha sin imposibilitarla. | | | | | |
|  |  | | 2.BUENO.Movilidad articular pasiva de extremidades adecuado,  Sin que dificulte la marcha. | | | | | |
|  |  | |  | |  |  |  |  |
|  | | | | | |  |  |  |
| | **2.-TRONCO EN SEDESTACIÓN (0-5):** | | | | | | |  | | --- | --- | --- | --- | --- | --- | --- | --- | | Se sentará al paciente en la camilla, sin apoyo posterior, los pies apoyados en el suelo. | | | | | | | | | | | | | Se valorará la capacidad que tiene la persona para mantener el control del tronco sin apoyo alguno. | | | | | | | | | | | | | Las manos se colocarán sobre los muslos. | | | | | | | | |  | **Puntuación:** | 0. Imposible/ Gran ayuda de 2 personas. | | | |  |  | 1. Moderada-máxima ayuda de 1 persona. | | | | |  |  | 2. Mínima ayuda de 1 persona. | | | |  |  | 3. Autónomo, con más de 1 intento, precisando supervisión. | | | | | | | | | |  |  | 4. Autónomo, estable, sin supervisión. | | | |  |  | 5. Autónomo, estable, ante pequeños empujones sobre el tronco. | | | | | | | | | |  | |  |  | |  | | | | | | | | | | **3.-BIPEDESTACIÓN (0-5):** | | |  | | | |  | | Persona en bipedestación, pies a la altura de las caderas. | | | | | | | | | | Se valorará la capacidad para mantenerse de pie de forma autónoma. | | | | | | | | | | |  | **Puntuación:** | 0. Imposible/ Gran ayuda de 2 personas. | | | |  |  | 1. Moderado-máximo apoyo/descarga de 1 persona. | | | | |  |  | 2. Mínimo apoyo/descarga de 1 persona. | | | |  |  | 3,Autónomo,con más de un intento para mantener la estabilidad,  precisando supervisión. | | | | | | | | | |  |  | 4. Autónomo, estable, un intento. | | | |  |  | 5. Autónomo, estable, ante pequeños empujones sobre el tronco. | | | | | | | | | | **4.-MARCHA (0-25):** | | |  | | | |  | |  | **Puntuación:** | 0. Marcha nula o con ayuda física de 2 personas. | | | | |  |  | 5. Marcha con gran ayuda física de 1 persona**. | | | | |  |  | 10. Marcha con un ligero contacto físico de 1 persona*. | | | | |  |  | 15. Marcha sólo, con supervisión de 1 persona. | | | | |  |  | 20. Marcha independiente en terreno llano. | | | | |  |  | 25. Marcha independiente en terrenos irregulares.  **La marcha asistida de andador + 1 persona, se puntuará con 5  * La marcha autónoma con andador se puntuará con 10. | | | | | **5.-RADIO DE ACCIÓN DE MARCHA (0-7):** | | | | | | | | | Se valorará la distancia en metros que es capaz de caminar. | | | | | | | | | |  | **Puntuación:** | 0. Marcha imposible. | | |  |  | 1. Distancia caminada entre 0-10 metros. | | | |  |  | 2. Entre 10-20 metros. | | |  |  | 3. Entre 20.50 metros. | | |  |  | 5. Entre 50-150 metros. | | |  |  | 7. Más de 150 metros. | | |  | | | | | | | | | | | | | | | | | | | |  |
|  | |  | |

Test Alusti Abreviado- Registrado 2017 Juan José Calvo, Josu Alustiza- Todos los Derechos Reservados
